# Supplementary material
Source: Royal Society of Chemistry journal article supplement (doi:10.1039/d5ta09769j)
Supplement: d5ta09769j1.pdf [file d5ta09769j1.pdf]

**Supporting Information for**

**Tuning Product Selectivity in Direct Electroreduction of NO via Phase Engineering of MoS<sub>2</sub> Nanosheets in Water-fed PEM Electrolyzer**

Min Li,<sup>a,c</sup> Frank Hernandez Baena,<sup>a</sup> Shota Matsuo,<sup>a</sup> Mingliang Chen,<sup>a</sup> Boaz Izelaar,<sup>b,c</sup> Ruud Kortlever,<sup>b,c</sup> and Atsushi Urakawa<sup>\*a,c</sup>

<sup>a</sup>Department of Chemical Engineering, Delft University of Technology, Van der Maasweg 9, 2629 HZ, Delft, the Netherlands

<sup>b</sup>Department of Process & Energy, Delft University of Technology, Leeghwaterstraat 39, 2628 CB, Delft, the Netherlands

<sup>c</sup>e-Refinery Institute, Delft University of Technology, Leeghwaterstraat 39, 2628 CB Delft, the Netherlands

Corresponding Author: [A.Urakawa@tudelft.nl](mailto:A.Urakawa@tudelft.nl)

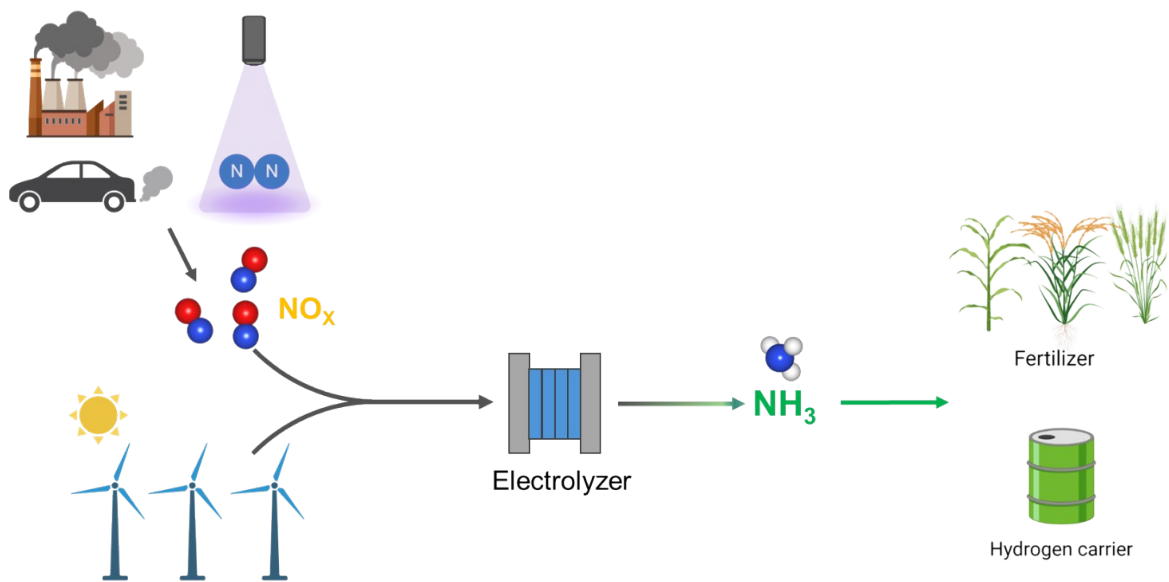

Figure S1. Schematic of electrochemical NO<sub>x</sub> reduction for ammonia production.

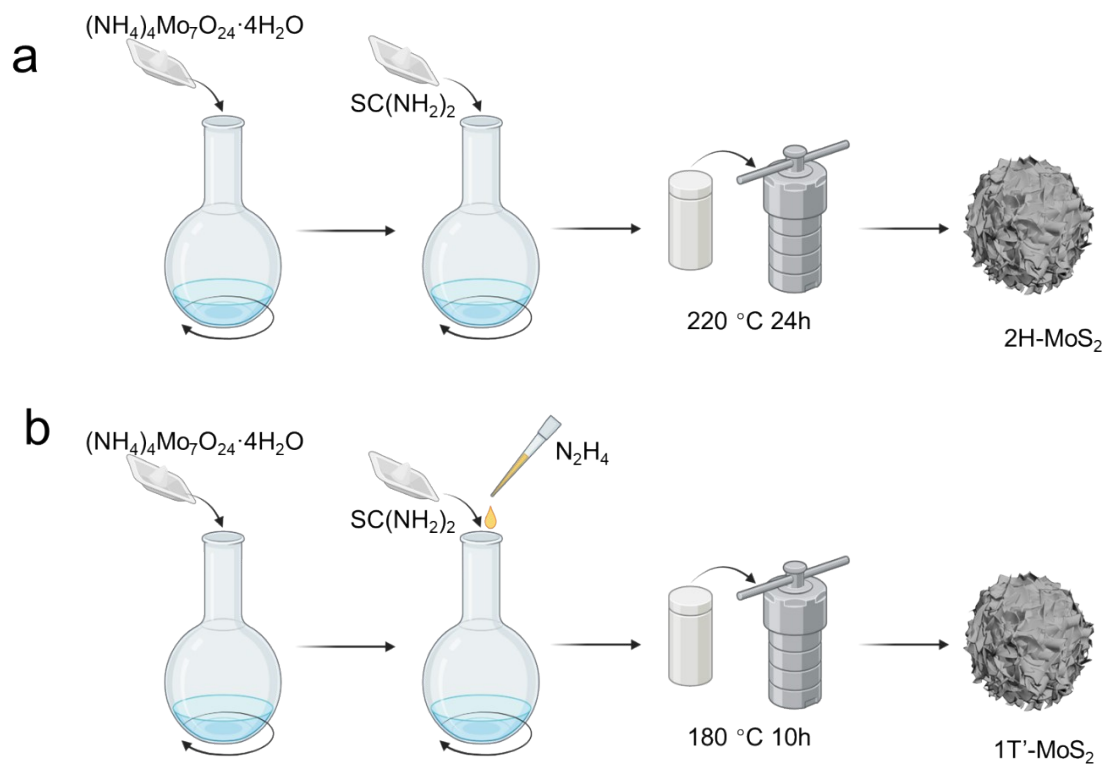

Figure S2. MoS<sub>2</sub> hydrothermal synthesis protocol (a) 2H-MoS<sub>2</sub> and (b) 1T'-MoS<sub>2</sub>.

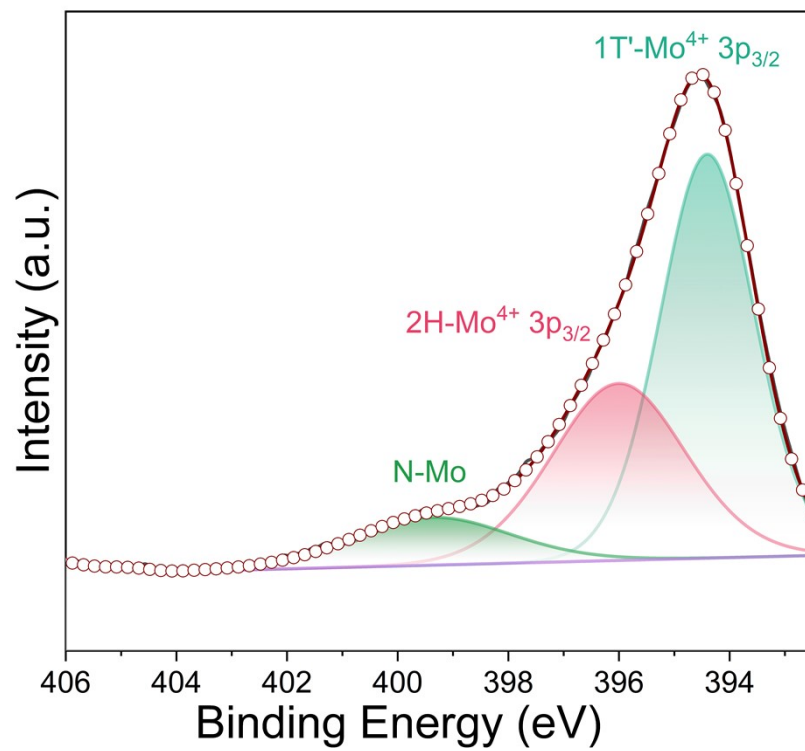

Figure S3. XPS spectra associated with N (1s) for 1T'-MoS<sub>2</sub>.

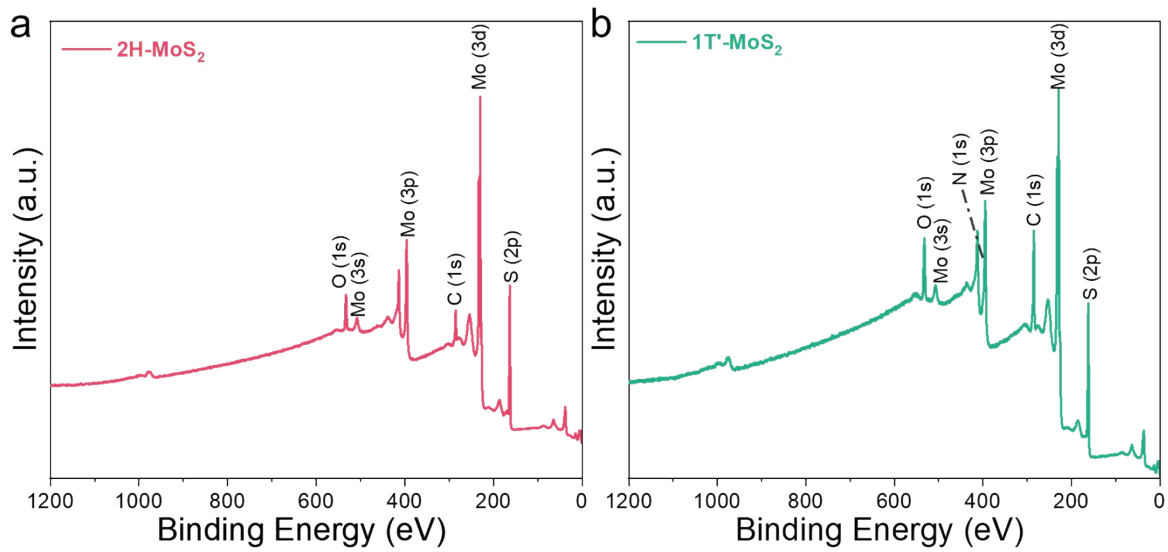

Figure S4. XPS survey scan of (a) 2H-MoS<sub>2</sub> and (b) 1T'-MoS<sub>2</sub>.

**Table S1.** Elemental analyses of 2H and 1T' phases of MoS<sub>2</sub> using XPS

| Catalyst             | Atomic percentage of Mo | Atomic percentage of S | Atomic ratio |
|----------------------|-------------------------|------------------------|--------------|
| 2H-MoS <sub>2</sub>  | 35%                     | 65%                    | 1:1.86       |
| 1T'-MoS <sub>2</sub> | 38%                     | 62%                    | 1:1.63       |

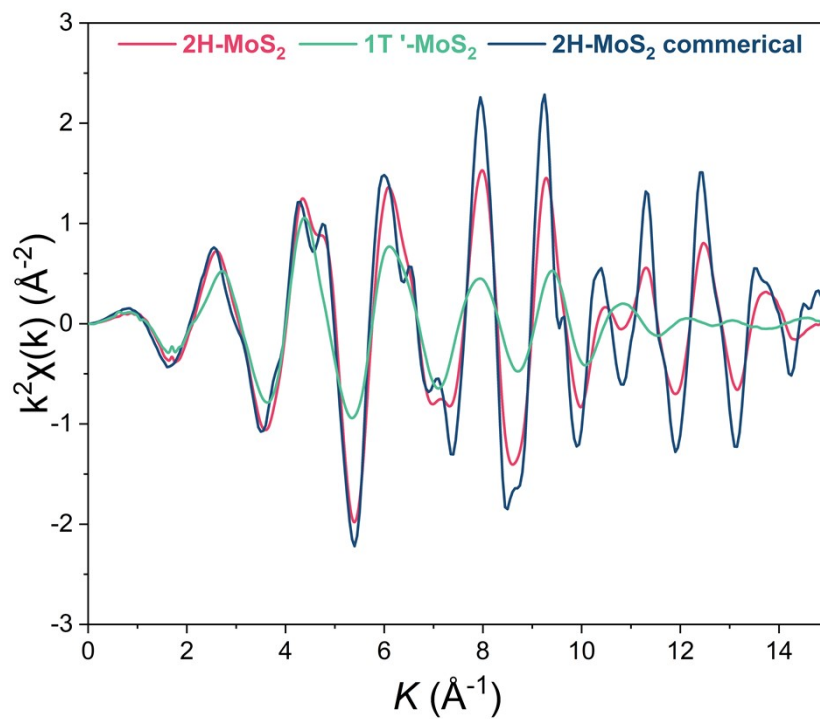

Figure S5. Mo K-edge oscillation functions  $k^2\chi(k)$  for  $\text{MoS}_2$  samples.

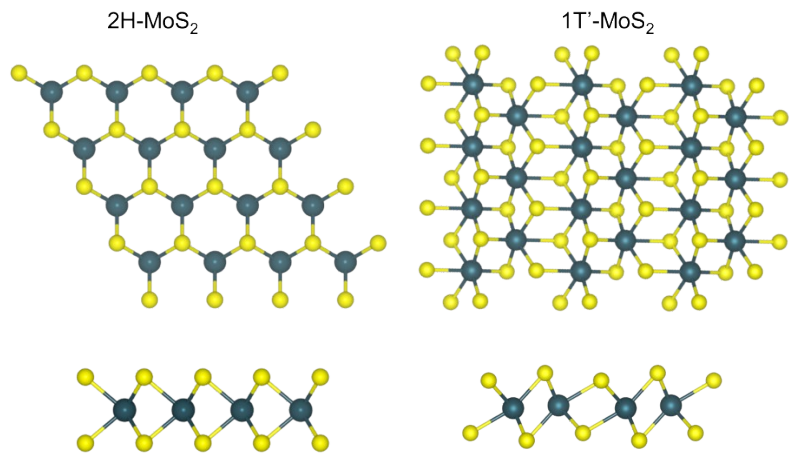

FigureS6. The atomic models of 2H and 1T' phases of MoS<sub>2</sub>. Upside: top view of the structure; downside: side view of the structures.

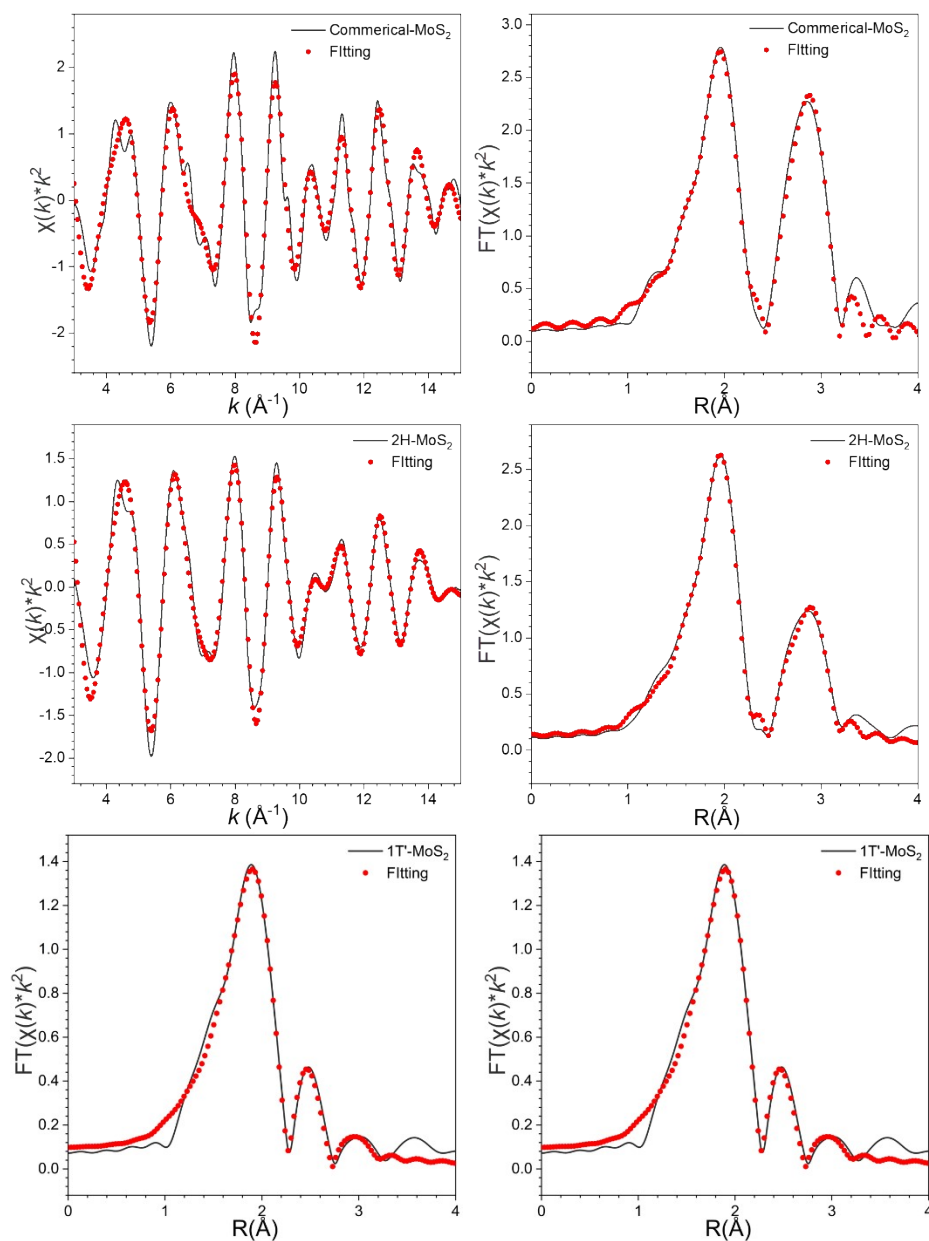

Figure S7. (a) Fitting curves for EXAFS data at the Mo K-edge for (a & b) commercial MoS<sub>2</sub>; (c & d) 2H-MoS<sub>2</sub> and (e & f) 1T'-MoS<sub>2</sub>, respectively.

**Table S2.** Curve fit parameters for Mo K-edge EXAFS for MoS<sub>2</sub> samples

| Sample                         | Path  | E <sub>0</sub> (eV) | N      | R / Å   | σ <sup>2</sup> / Å <sup>2</sup> | R factor |
|--------------------------------|-------|---------------------|--------|---------|---------------------------------|----------|
| MoS <sub>2</sub><br>commercial | Mo-S  | 1±1                 | 5.1(4) | 2.41(1) | 0.002(1)                        | 0.0012   |
|                                | Mo-Mo |                     | 6.0(1) | 3.17(2) | 0.003(1)                        |          |
| 2H-MoS <sub>2</sub>            | Mo-S  | 2±1                 | 5.7(3) | 2.41(1) | 0.003(1)                        | 0.0009   |
|                                | Mo-Mo |                     | 4.5(8) | 3.17(2) | 0.004(1)                        |          |
| 1T'-MoS <sub>2</sub>           | Mo-S  | 0±1                 | 4.6(4) | 2.40(1) | 0.007(1)                        | 0.0016   |
|                                | Mo-Mo |                     | 0.8(5) | 2.77(3) | 0.004(1)                        |          |

\* S<sub>0</sub><sup>2</sup> was fixed as 0.9 and determined through fitting of a Mo foil using an available standard Mo.cif (mp-129). Data ranges: 3 ≤ k ≤ 15 Å, 1.0 ≤ R ≤ 3.3 Å. The total number of independent data points were 15.8, 17.3 and 17.3 for MoS<sub>2</sub> commercial, 2H-MoS<sub>2</sub> and 1T'-MoS<sub>2</sub>, respectively.

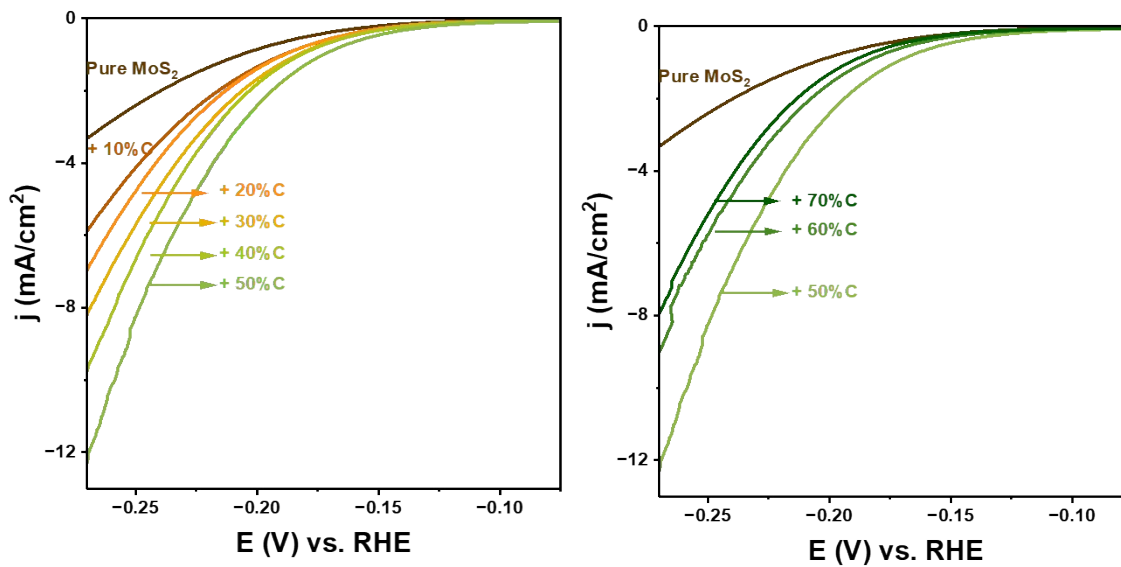

Figure S8. LSV curves of 2H-MoS<sub>2</sub> with different carbon ratio in 0.1 M H<sub>2</sub>SO<sub>4</sub> electrolyte.

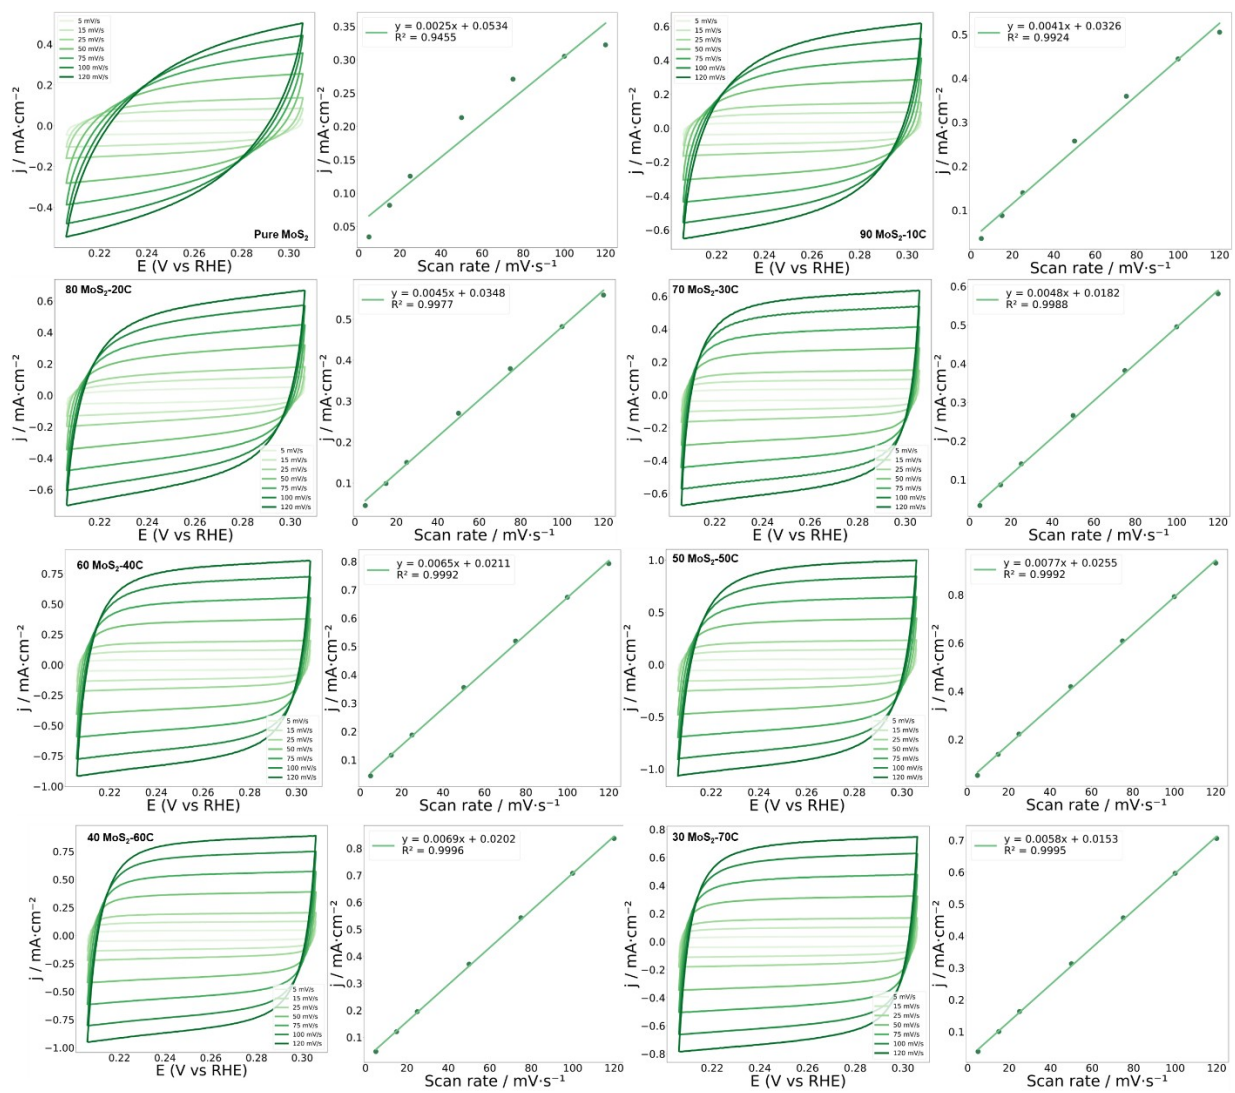

Figure S9. CV curves for CdI at different scan rates (5–120  $\text{mV}\cdot\text{s}^{-1}$ ); (b) electrochemical double layer capacitance (CdI) for 2H-MoS<sub>2</sub> with different carbon ratios.

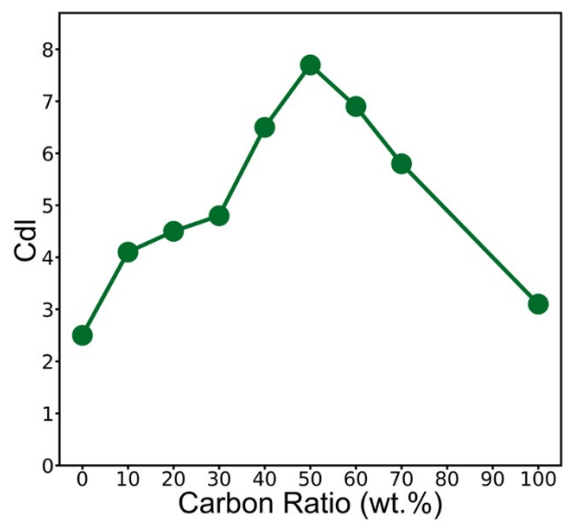

Figure S10. Comparison of electrochemical double layer capacitance (Cdl) for 2H-MoS<sub>2</sub> with different carbon ratios.

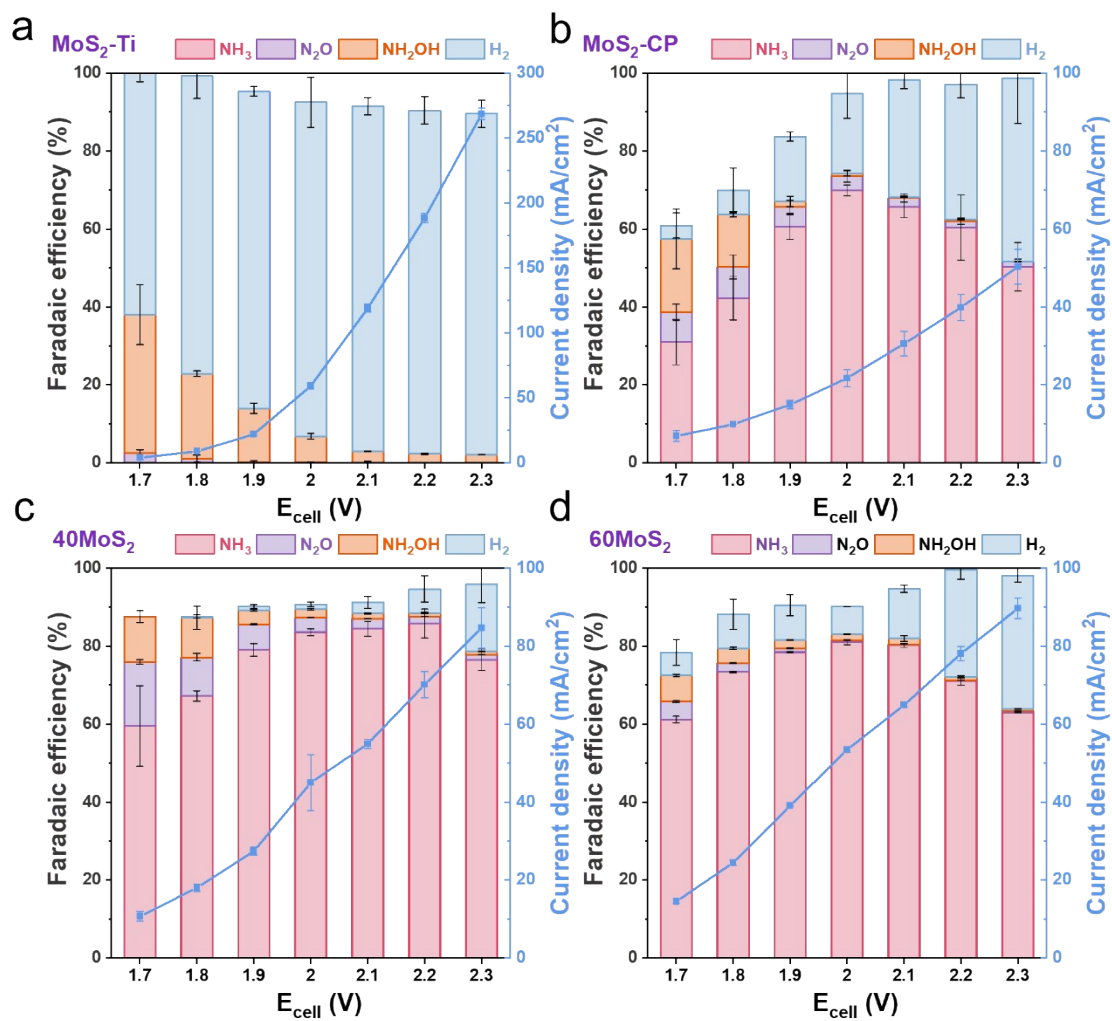

Figure S11. Faradaic efficiency for electrocatalytic NORR as a function of cell voltage (1.7 to 2.3 V) for

(a) Pure  $\text{MoS}_2$  with Ti GDL; (b) pure  $\text{MoS}_2$ ; (c)  $40\text{MoS}_2/60\text{C}$ ; (d)  $60\text{MoS}_2/40\text{C}$  with carbon paper.

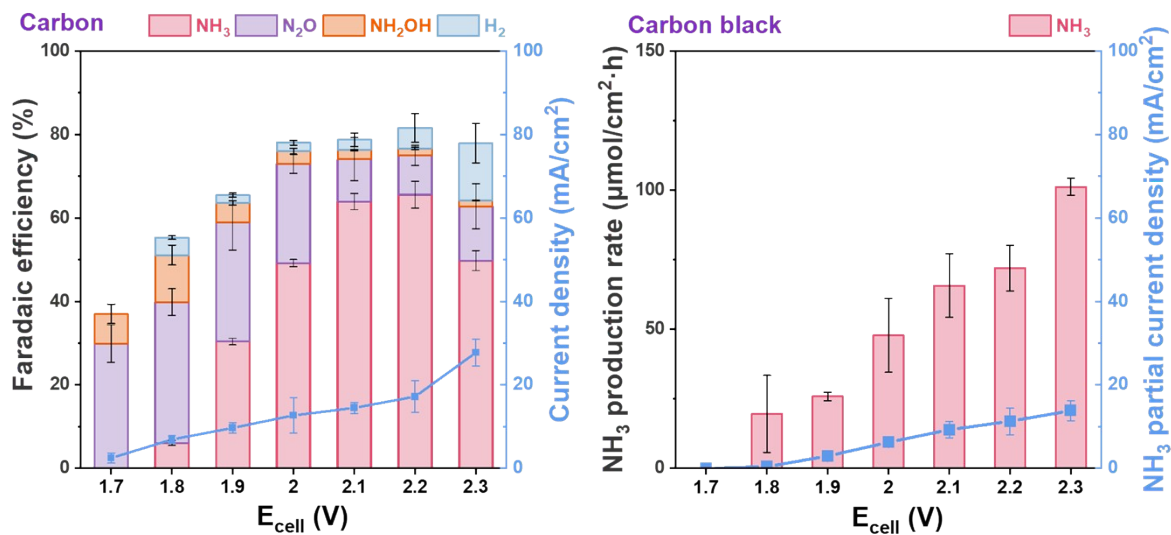

Figure S12. (a) Faradaic efficiency; (b) ammonia production rate for electrocatalytic NORR as a function of cell voltage (1.7 to 2.3 V) for carbon black.

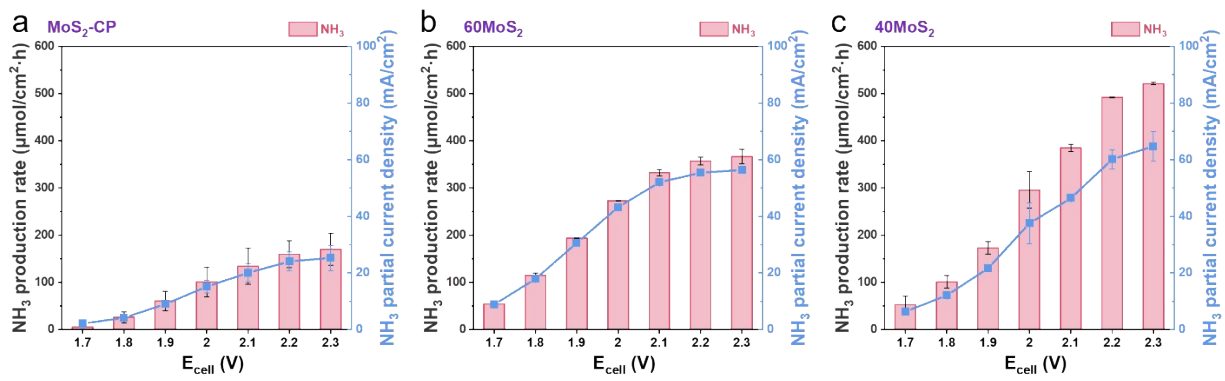

Figure S13. Ammonia production rate and partial current density for (a) MoS<sub>2</sub> with carbon paper (CP); (b) 60MoS<sub>2</sub>/40C with carbon paper and (c) 40MoS<sub>2</sub>/60C with carbon paper.

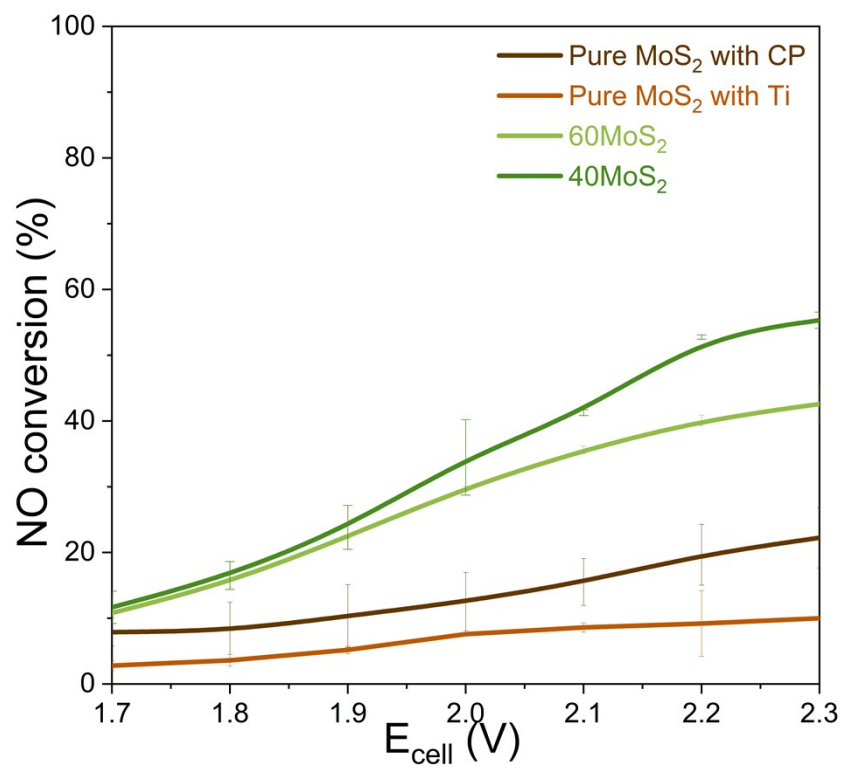

Figure S14. Single pass NO conversion rate.

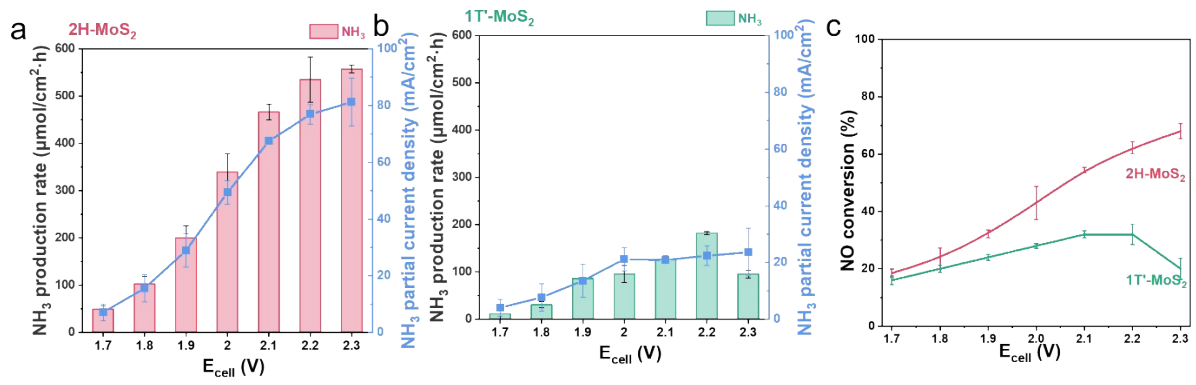

Figure S15. Ammonia production rate and partial current density on (a) 2H- and (b) 1T'-MoS<sub>2</sub>; (c) NO conversion.

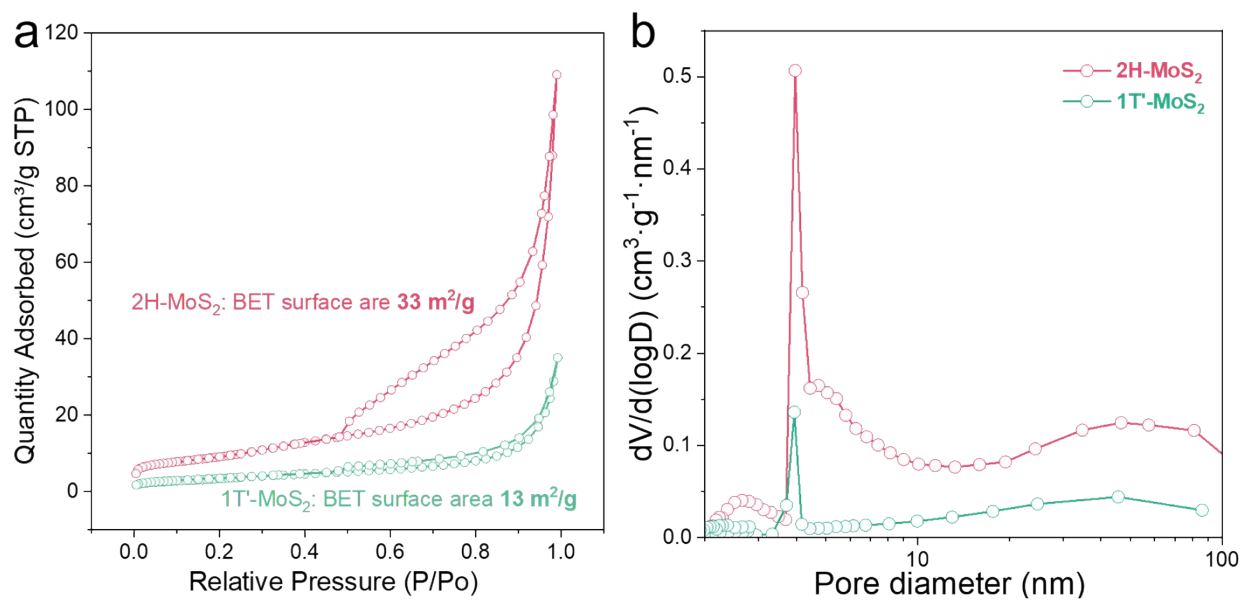

Figure S16. (a) BET surface area and (b) pore-size distribution curves of as-prepared 2H- and 1T'-MoS<sub>2</sub> samples.

Table S3. Relative atomic percentage distribution of Mo for 2H and 1T' - MoS<sub>2</sub> using XPS

| Sample                      | Relative atomic percentage of Mo |     |                  |                  |
|-----------------------------|----------------------------------|-----|------------------|------------------|
|                             | 1T                               | 2H  | Mo <sup>5+</sup> | Mo <sup>6+</sup> |
| 2H-MoS <sub>2</sub> -Fresh  |                                  | 94% |                  | 6%               |
| 2H-MoS <sub>2</sub> -Used   |                                  | 66% | 11%              | 23%              |
| 1T'-MoS <sub>2</sub> -Fresh | 80%                              | 15% | 3%               | 2%               |
| 1T'-MoS <sub>2</sub> -Used  | 22%                              | 22% | 16%              | 40%              |

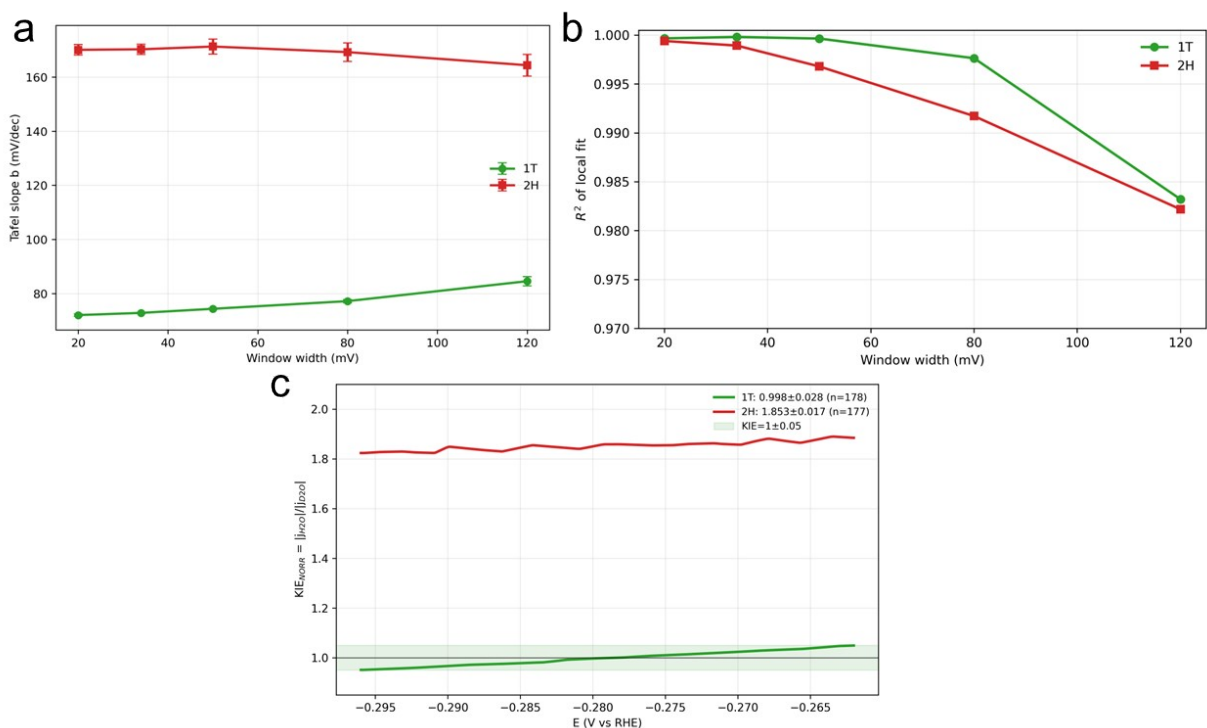

Figure S17. (a) Window-width sensitivity and (b) fitting linearity  $R^2$  of extracted local Tafel slopes; (c) apparent KIE values across the window.

A potential window ( $E_{\text{RHE}} = -0.296$  to  $-0.262$  V) was selected to ensure a locally consistent kinetic regime. Within this window, the local Tafel representation ( $\eta^* = -E_{\text{RHE}}$  vs  $\log|j|$ ) remains highly linear (high  $R^2$ ), and the local derivative  $d(\log|j|)/dE$  is comparatively stable, minimizing regime mixing in the extracted kinetic descriptors. The robustness of the extracted local Tafel slopes was further assessed by varying the window width around the same center potential: the fitted slopes remain essentially unchanged for moderate window widths (20-80 mV), whereas substantially wider windows (e.g., 120 mV) reduce linearity and indicate mixing of kinetic regimes. Extending the analysis to more negative potential is also avoided because it increases the likelihood of competing-current contributions (e.g., HER) and additional regime transitions that can confound interpretation.

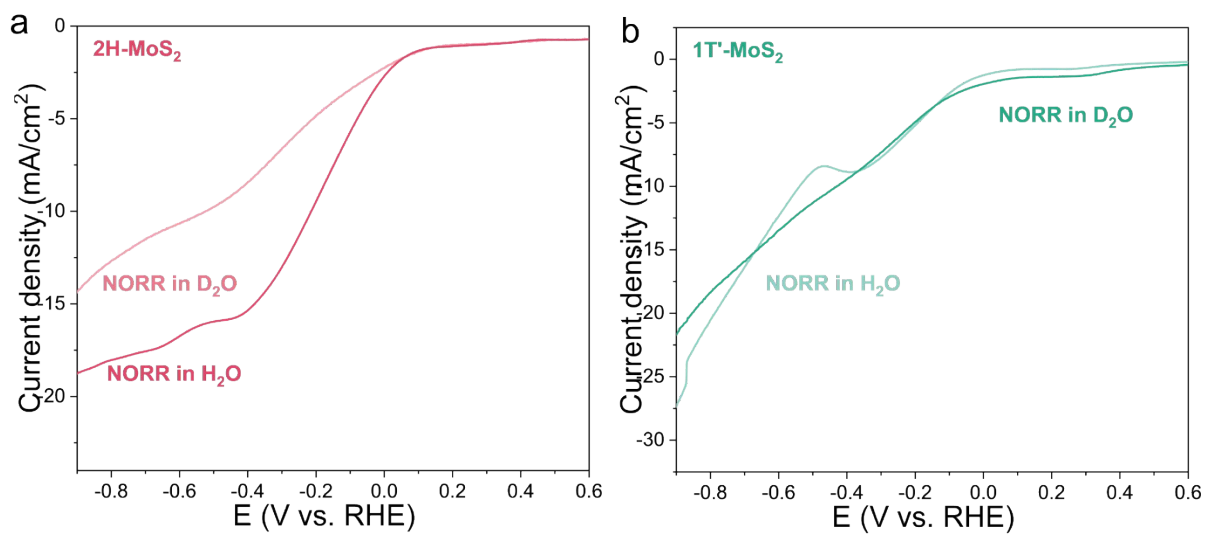

Figure S18. (a) and (b) LSV scan for 2H- and 1T'-MoS<sub>2</sub> in a batch cell.

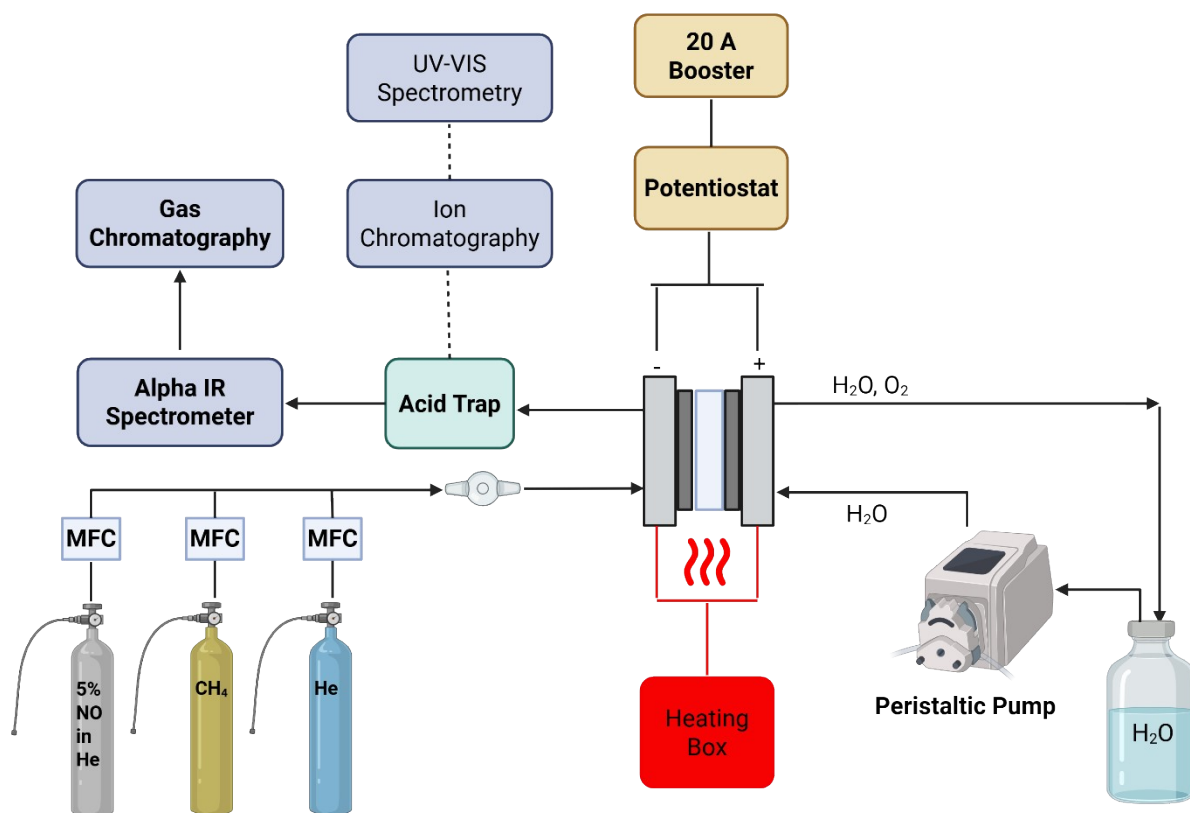

Figure S19. Experimental setup of electrochemical NO reduction.

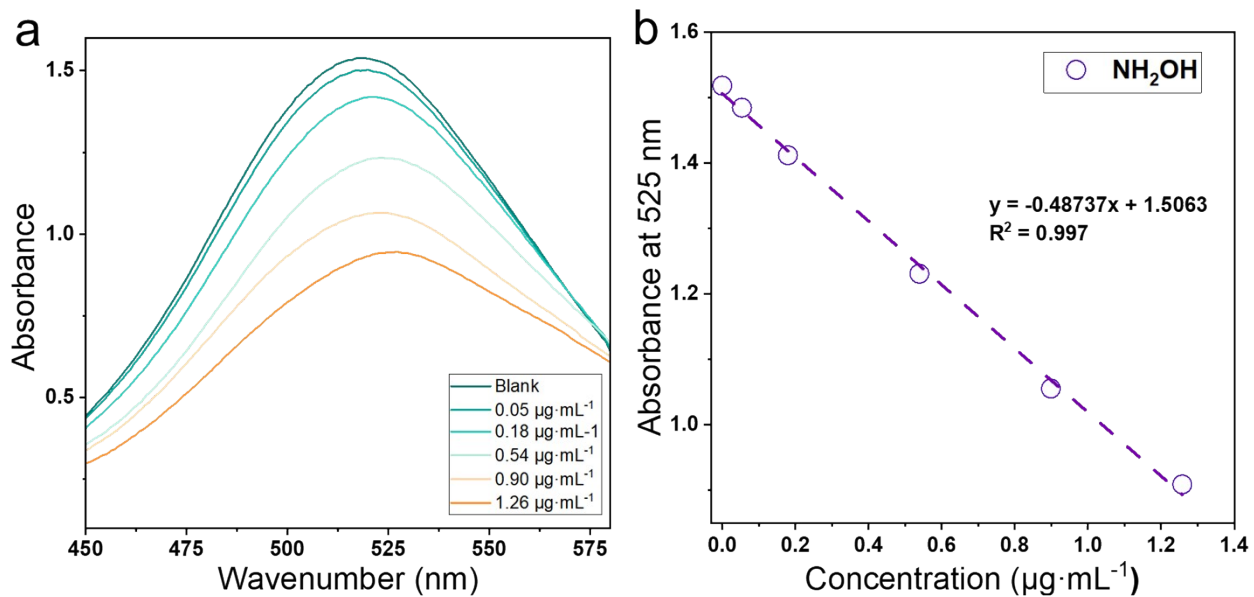

Figure S20. Neutral red method for hydroxylamine quantification. (a) UV-Vis absorption spectra of various hydroxylamine concentrations. (b) calibration curve for hydroxylamine quantification.

| Catalyst                                         | Electrolyzer                     | NO concentration | Liquid electrolyte                    | Potential                 | NH <sub>3</sub> FE (%) | NH <sub>3</sub> production rate $\mu\text{mol cm}^{-2} \text{h}^{-1}$ |
|--------------------------------------------------|----------------------------------|------------------|---------------------------------------|---------------------------|------------------------|-----------------------------------------------------------------------|
| Co/Co <sub>3</sub> O <sub>4</sub> <sup>1</sup>   | H cell                           | 10% NO           | 0.1 M PBS                             | -0.6 V vs. RHE            | 94.7                   | 340.4                                                                 |
| S-Cu@Co/C <sup>2</sup>                           | H cell                           | 10% NO           | 0.1 M PBS                             | -0.6 V vs. RHE            | 92.4                   | 655.3                                                                 |
| Mo <sub>2</sub> C <sup>3</sup>                   | H cell                           | 99.99% NO        | 0.5 M Na <sub>2</sub> SO <sub>4</sub> | -0.4 V vs. RHE            | 86.3                   | 122.7                                                                 |
| CuNi@BCN <sup>4</sup>                            | Flow cell                        | 10% NO           | PBS                                   | -0.5 V vs. RHE            | 95.1                   | 573.7                                                                 |
| Co <sub>1</sub> /MoS <sub>2</sub> <sup>5</sup>   | H cell                           | 99.99% NO        | 0.5 M Na <sub>2</sub> SO <sub>4</sub> | -0.5 V vs. RHE            | 87.7                   | 217.6                                                                 |
| Cu nanowire array <sup>6</sup>                   | H-type high-pressure electrolyze | 99.9% NO         | 1 M KOH                               | -0.4 V vs. RHE            | 96.1                   | 10500                                                                 |
| Porous Ni (DHBT Ni on GDL) <sup>7</sup>          | AEM                              | 1% NO            | No                                    | 100 mA/cm <sup>2</sup>    | 92                     | 556                                                                   |
| Cu <sub>6</sub> Sn <sub>5</sub> <sup>8</sup>     | Flow cell                        | 70% NO           | 0.5 M KOH                             | >1.400 mA/cm <sup>2</sup> | 96                     | 10000                                                                 |
| CoMn <sub>2</sub> O <sub>4</sub> /C <sup>9</sup> | H-cell                           | 99.9% NO         | 0.1 M Na <sub>2</sub> SO <sub>4</sub> | -0.7 V vs. RHE            | 89.3                   | 497.6                                                                 |
| 40 wt% Ru/C <sup>10</sup>                        | PEM                              | 5.2% NO          | No                                    | 1.9 V                     | 93                     | 510                                                                   |
| 50 wt.% MoS <sub>2</sub> /C                      | PEM                              | 5% NO            | No                                    | 2.3 V                     | 64.5                   | 558                                                                   |

Table S4. Comparison of NH<sub>3</sub> production rate vs. potential from reported studies.

## Reference

1. X. Fan, L. Han, Y. Bi, J. Song, X. Li, H. Duan and D. Zhang, *Applied Catalysis B: Environment and Energy*, 2025, **375**, 125416.
2. Z. Wang, H. Duan, W. Qu, D. Han, X. Li, L. Zhu, X. Jiang, D. Cheng, Y. Shen, M. Xie, E. Cortes and D. Zhang, *Angewandte Chemie International Edition*, 2025, **64**, e202511398.
3. K. Chen, P. Shen, N. Zhang, D. Ma and K. Chu, *Inorganic Chemistry*, 2023, **62**, 653-658.
4. Z. Wang, H. Duan, W. Qu, H. Zhang, L. Han, Z. Teng, G. Chen, D. Cheng, X. Wang, Y. A. Wu, M. Xie and D. Zhang, *Advanced Functional Materials*, 2025, **35**, 2507533.
5. X. Li, K. Chen, X. Lu, D. Ma and K. Chu, *Chemical Engineering Journal*, 2023, **454**, 140333.
6. W. Yang, H. Liu, X. Chang, Y. Zhang, Y. Cai, Y. Li, Y. Cui, B. Xu, L. Yu, X. Cui and D. Deng, *Nature Communications*, 2025, **16**, 1257.
7. A. Singh-Morgan, K. Trösch, A. Weinfurter, M. Inniger, Y.-Z. Xu and V. Mougel, *Chem*, 2025, **11**, 102460.
8. J. Shao, H. Jing, P. Wei, X. Fu, L. Pang, Y. Song, K. Ye, M. Li, L. Jiang, J. Ma, R. Li, R. Si, Z. Peng, G. Wang and J. Xiao, *Nature Energy*, 2023, **8**, 1273-1283.
9. Z. Niu, S. Fan and X. Li, *Journal of Materials Chemistry A*, 2024, **12**, 19988-19994.
10. S. Bunea, M. Coppens and A. Urakawa, *ACS Catalysis*, 2023, **13**, 11345-11351.
